# Supplementary material
Source: Springer Nature journal article supplement (https://www.springermedizin.de/resource/supplementary/12879_2011_1625_MOESM1_ESM.pdf/9442944)

Enrolled volunteers (45 men, 15 women).

Eligible participants for FGD (35 men, 8 women).

Participants excluded because they took part in interviews before (10 men, 7 women). Of these, 8 men and 4 women respectively completed all the 5 vaccinations.

**Study participants**

Participants registered for FGDs (28 men, 7 women)- Of these, 26 men and one woman had received all 5 vaccinations (DNA/placebo). The rest had received 3-4 vaccinations.

Not accessible for FGD (7 men, 1 woman) – Of these, three men had all 5 vaccinations. The rest had received 3-4 vaccinations.

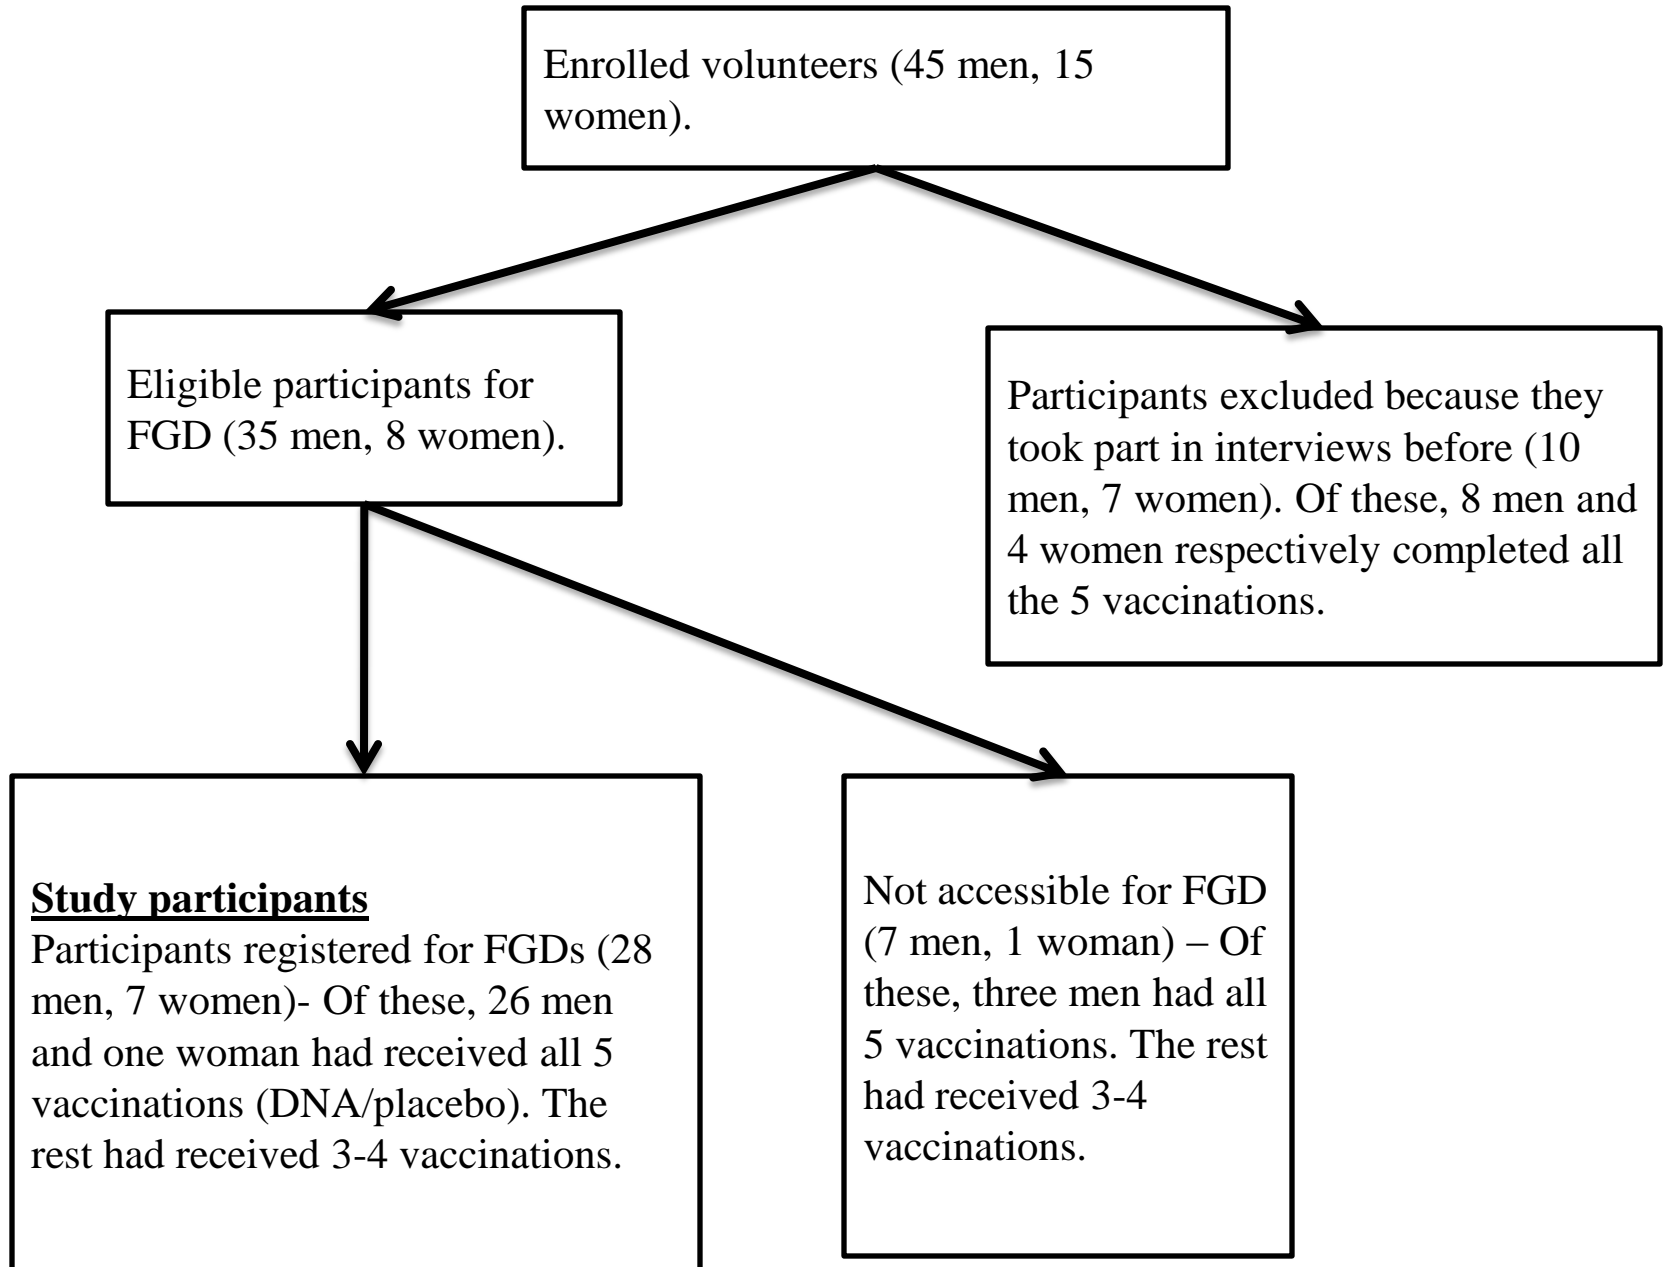

Supplement: MOESM1 [file 9442944]
